# Supplementary material
Source: publisher site journal article supplement (https://www.dovepress.com/article/432982)
Supplement: Supplementary file 1 [file get_supplementary_file.php]

**Supplementary material**

# The measurement items of the main variables

**OAP responding to COVID-19 (Organizational adaptive practices responding to COVID-19)**

1. During the COVID-19 pandemic, my organization implemented a flexible work schedule, allowing me to arrange my working hours freely.

2. During the COVID-19 pandemic, my organization implemented a telecommuting program, allowing me to work from home or other places.

3. During the COVID-19 pandemic, my organization implemented a paid-leave policy, allowing me to take a personal leave with pay.

4. During the COVID-19 pandemic, my organization implemented an employee security plan, providing me with adequate supplies for epidemic prevention.

**PR (Psychological resilience)**

1. Able to adapt to change.

2. Can deal with whatever comes.

3. Tries to see humorous side of problems.

4. Coping with stress can strengthen me.

5. Tend to bounce back after illness or hardship.

6. Can achieve goals despite obstacles.

7. Can stay focused under pressure.

8. Not easily discouraged by failure.

9. Thinks of self as strong person.

10. Can handle unpleasant feelings.

**EE (Emotional exhaustion)**

1. I feel emotionally drained from my work.

2. I feel burned out from my work.

3. I feel exhausted when I think about having to face another day on the job.

**JS (Job satisfaction)**

1. All in all I am satisfied with my job.

2. In general, I don’t like my job.

3. In general, I like working here.
